# Supplementary material for: Employees Receiving Inpatient Treatment for Common Mental Disorders in Germany: Factors Associated with Time to First and Full Return to Work
Source: Springer Nature journal article supplement (doi:10.1007/s10926-021-09985-4), 2021-05-29
Supplement: MOESM1 [file 19209236]

*Title:* Employees receiving inpatient treatment for common mental disorders in Germany: Factors associated with time to first and full return to work; *Journal of Occupational Rehabilitation*;  
*Authors:* Alexandra Sikora, Gundolf Schneider, Uta Wegewitz, Ute Bültmann;  
*Corresponding author:* Alexandra Sikora, Federal Institute for Occupational Safety and Health (BAuA),  
 Sikora.Alexandra@baua.bund.de

**Supplementary Material 1.** Fitting null models.

**1.1 Time to first RTW: Estimation results for several survival curves, no covariates**

Akaike's information criterion and Bayesian information criterion

| Model              | N   | ll(null)  | ll(model) | df | AIC      | BIC      |
|--------------------|-----|-----------|-----------|----|----------|----------|
| <u>exponential</u> | 269 | -640.7057 | -640.7057 | 1  | 1283.411 | 1287.006 |
| <u>weibull</u>     | 269 | -543.0385 | -543.0385 | 2  | 1090.077 | 1097.266 |
| <u>gompertz</u>    | 269 | .         | -513.4695 | 2  | 1030.939 | 1038.128 |
| <u>lognormal</u>   | 269 | .         | -502.4559 | 2  | 1008.912 | 1016.101 |
| <u>loglogistic</u> | 269 | .         | -499.183  | 2  | 1002.366 | 1009.555 |
| <u>ggamma</u>      | 269 | .         | -494.4236 | 3  | 994.8472 | 1005.631 |

Note: BIC uses N = number of observations. See [\[R\] BIC note](#).

Likelihood-ratio tests found statistically significant differences between the loglogistic, lognormal and the ggamma function ( $p < .01$ ;  $p < .001$ ). The ggamma model best described the time to first RTW.

**1.2 Time to full RTW: Estimation results for several survival curves, no covariates**

Akaike's information criterion and Bayesian information criterion

| Model              | N   | ll(null)  | ll(model) | df | AIC      | BIC      |
|--------------------|-----|-----------|-----------|----|----------|----------|
| <u>exponential</u> | 269 | -616.739  | -616.739  | 1  | 1235.478 | 1239.073 |
| <u>weibull</u>     | 269 | -549.6345 | -549.6345 | 2  | 1103.269 | 1110.458 |
| <u>gompertz</u>    | 269 | .         | -552.9167 | 2  | 1109.833 | 1117.023 |
| <u>lognormal</u>   | 269 | .         | -540.6879 | 2  | 1085.376 | 1092.565 |
| <u>loglogistic</u> | 269 | .         | -544.7304 | 2  | 1093.461 | 1100.65  |
| <u>ggamma</u>      | 269 | .         | -540.5368 | 3  | 1087.074 | 1097.858 |

Note: BIC uses N = number of observations. See [\[R\] BIC note](#).

Based on the AIC and BIC for the empty model, a lognormal survival function would be most preferable, but a likelihood-ratio test found no significant differences between the lognormal and the ggamma function ( $p = 0.58$ ). It was, therefore, continued with the ggamma survival function.
