# Supplementary material for: Employees Receiving Inpatient Treatment for Common Mental Disorders in Germany: Factors Associated with Time to First and Full Return to Work
Source: Springer Nature journal article supplement (doi:10.1007/s10926-021-09985-4), 2021-05-29
Supplement: MOESM2 [file 19209236]

*Title:* Employees receiving inpatient treatment for common mental disorders in Germany: Factors associated with time to first and full return to work; *Journal of Occupational Rehabilitation*;  
*Authors:* Alexandra Sikora, Gundolf Schneider, Uta Wegewitz, Ute Bültmann;  
*Corresponding author:* Alexandra Sikora, Federal Institute for Occupational Safety and Health (BAuA),  
Sikora.Alexandra@baua.bund.de

**Supplementary Table 1.** Estimation results of the univariable parametric survival analysis.

|                                                  | n   | Time to first RTW |               |         | Time to full RTW |               |         |
|--------------------------------------------------|-----|-------------------|---------------|---------|------------------|---------------|---------|
|                                                  |     | Coef.             | 95% CI        | P value | Coef.            | 95% CI        | P value |
| Treatment setting ( <i>rehabilitation</i> )      | 269 | -1.46             | -1.75 ; -1.16 | 0.000   | -2.09            | -2.48 ; -1.71 | 0.000   |
| <i>Sociodemographics</i>                         |     |                   |               |         |                  |               |         |
| Age                                              | 269 | -0.01             | -0.03 ; 0.01  | 0.429   | -0.02            | -0.04 ; 0.01  | 0.246   |
| Sex ( <i>male</i> )                              | 269 | 0.15              | -0.20 ; 0.51  | 0.394   | 0.28             | -0.17 ; 0.74  | 0.223   |
| Socioeconomic status                             | 266 | 0.06              | 0.01 ; 0.11   | 0.021   | 0.04             | -0.03 ; 0.11  | 0.261   |
| <i>Health-related factors</i>                    |     |                   |               |         |                  |               |         |
| Previous sickness absence and treatment duration | 269 | 0.09              | 0.07 ; 0.11   | 0.000   | 0.13             | 0.11 ; 0.15   | 0.000   |
| Self-rated health ( <i>good</i> )                | 269 | -1.07             | -1.55 ; -0.59 | 0.000   | -1.34            | -1.85 ; -0.83 | 0.000   |
| Depressive symptoms                              | 269 | 0.09              | 0.05 ; 0.13   | 0.000   | 0.09             | 0.04 ; 0.14   | 0.000   |
| First medical diagnosis ( <i>adjustment</i> )    | 269 | -1.15             | -1.63 ; -0.68 | 0.000   | -1.54            | -2.14 ; -0.94 | 0.000   |
| Medical treatment ( <i>yes</i> )                 | 269 | 0.50              | 0.14 ; 0.87   | 0.007   | 0.64             | 0.18 ; 1.10   | 0.007   |
| Work-relatedness of disorder                     | 268 | 0.25              | 0.09 ; 0.41   | 0.002   | 0.41             | 0.19 ; 0.62   | 0.000   |
| <i>Personal factors</i>                          |     |                   |               |         |                  |               |         |
| RTW expectation ( <i>positive</i> )              | 269 | -2.15             | -2.61 ; -1.69 | 0.000   | -2.37            | -2.97 ; -1.77 | 0.000   |
| RTW-SE ( <i>high</i> )                           | 269 | -0.91             | -1.26 ; -0.56 | 0.000   | -1.52            | -1.94 ; -1.11 | 0.000   |
| Work ability                                     | 269 | -0.38             | -0.46 ; -0.30 | 0.000   | -0.47            | -0.55 ; -0.38 | 0.000   |
| <i>Work-related factors</i>                      |     |                   |               |         |                  |               |         |
| Company size ( <i>large</i> )                    | 269 | 0.39              | 0.01 ; 0.77   | 0.046   | 0.52             | 0.04 ; 1.01   | 0.035   |
| Enterprise sector ( <i>private</i> )             | 269 | 0.27              | -0.11 ; 0.65  | 0.166   | 0.23             | -0.27 ; 0.72  | 0.366   |
| Shiftwork ( <i>yes</i> )                         | 269 | -0.35             | -0.76 ; 0.05  | 0.088   | -0.46            | -0.99 ; 0.07  | 0.088   |
| Civil servant ( <i>yes</i> )                     | 269 | 0.54              | -0.16 ; 1.24  | 0.133   | 1.20             | 0.29 ; 2.10   | 0.010   |
| Quantitative demands                             | 268 | 0.01              | 0.00 ; 0.03   | 0.008   | 0.02             | 0.00 ; 0.03   | 0.014   |
| Work-privacy conflict                            | 268 | 0.01              | 0.00 ; 0.02   | 0.002   | 0.02             | 0.01 ; 0.02   | 0.001   |
| Influence at work                                | 269 | -0.00             | -0.01 ; 0.01  | 0.739   | -0.01            | -0.02 ; 0.01  | 0.248   |
| Degrees of freedom at work                       | 269 | -0.00             | -0.01 ; 0.01  | 0.495   | -0.01            | -0.02 ; 0.00  | 0.140   |
| Meaning of work                                  | 269 | -0.01             | -0.02 ; -0.00 | 0.026   | -0.02            | -0.03 ; -0.01 | 0.001   |
| Quality of leadership                            | 266 | -0.01             | -0.02 ; -0.00 | 0.039   | -0.01            | -0.02 ; -0.00 | 0.029   |
| Social support                                   | 268 | -0.01             | -0.02 ; -0.00 | 0.004   | -0.02            | -0.03 ; -0.01 | 0.001   |
| Sense of community                               | 268 | -0.01             | -0.02 ; 0.00  | 0.064   | -0.02            | -0.03 ; -0.00 | 0.005   |
| Mobbing                                          | 268 | 0.18              | 0.01 ; 0.36   | 0.038   | 0.21             | -0.00 ; 0.42  | 0.053   |
| <i>Work accommodation needs</i>                  |     |                   |               |         |                  |               |         |
| Gradual RTW needed ( <i>yes</i> )                | 269 | 1.09              | 0.78 ; 1.41   | 0.000   | 2.15             | 1.77 ; 2.53   | 0.000   |
| Workload reduction needed ( <i>yes</i> )         | 269 | 0.44              | 0.06 ; 0.82   | 0.025   | 0.44             | -0.07 ; 0.95  | 0.090   |
| Individual RTW support needed ( <i>yes</i> )     | 269 | 0.94              | 0.43 ; 1.45   | 0.000   | 1.44             | 0.78 ; 2.11   | 0.000   |
| Change of workplace needed ( <i>yes</i> )        | 269 | 1.05              | 0.46 ; 1.63   | 0.000   | 0.98             | 0.21 ; 1.75   | 0.012   |

Coef. Coefficient; CI Confidence Interval

**Supplementary Table 2.** Estimation results of the univariable parametric post hoc subgroup survival analysis.

|                                                  | Psychiatric setting |                   |               |         |                  |               |         |     | Rehabilitation setting |               |         |                               |               |         |  |  |
|--------------------------------------------------|---------------------|-------------------|---------------|---------|------------------|---------------|---------|-----|------------------------|---------------|---------|-------------------------------|---------------|---------|--|--|
|                                                  | n                   | Time to first RTW |               |         | Time to full RTW |               |         | n   | Time to first RTW      |               |         | Time to full RTW <sup>1</sup> |               |         |  |  |
|                                                  |                     | Coef.             | 95% CI        | P value | Coef.            | 95% CI        | P value |     | Coef.                  | 95% CI        | P value | Coef.                         | 95% CI        | P value |  |  |
| <i>Sociodemographics</i>                         |                     |                   |               |         |                  |               |         |     |                        |               |         |                               |               |         |  |  |
| Age                                              | 157                 | 0.02              | -0.00 ; 0.04  | 0.064   | 0.02             | -0.00 ; 0.05  | 0.058   | 112 | 0.00                   | -0.03 ; 0.03  | 0.996   | -0.03                         | -0.08 ; 0.01  | 0.146   |  |  |
| Sex ( <i>male</i> )                              | 157                 | 0.09              | -0.31 ; 0.48  | 0.672   | -0.12            | -0.54 ; 0.30  | 0.575   | 112 | 0.08                   | -0.32 ; 0.49  | 0.696   | 0.59                          | -0.09 ; 1.27  | 0.091   |  |  |
| Socioeconomic status                             | 155                 | 0.04              | -0.02 ; 0.10  | 0.173   | -0.00            | -0.06 ; 0.06  | 0.998   | 111 | 0.02                   | -0.04 ; 0.08  | 0.434   | -0.03                         | -0.13 ; 0.08  | 0.606   |  |  |
| <i>Health-related factors</i>                    |                     |                   |               |         |                  |               |         |     |                        |               |         |                               |               |         |  |  |
| Previous sickness absence and treatment duration | 157                 | 0.06              | 0.04 ; 0.08   | 0.000   | 0.07             | 0.04 ; 0.10   | 0.000   | 112 | 0.08                   | 0.06 ; 0.10   | 0.000   | 0.15                          | 0.12 ; 0.19   | 0.000   |  |  |
| Self-rated health ( <i>good</i> )                | 157                 | -0.98             | -1.43 ; -0.53 | 0.000   | -0.95            | -1.39 ; -0.50 | 0.000   | 112 | -0.08                  | -0.65 ; 0.49  | 0.781   | -1.09                         | -1.98 ; -0.20 | 0.016   |  |  |
| Depressive symptoms                              | 157                 | 0.10              | 0.05 ; 0.14   | 0.000   | 0.08             | 0.03 ; 0.12   | 0.001   | 112 | 0.02                   | -0.03 ; 0.07  | 0.476   | 0.04                          | -0.03 ; 0.12  | 0.277   |  |  |
| First medical diagnosis ( <i>adjustment</i> )    | 157                 | -                 | - ; -         | -       | -                | - ; -         | -       | 112 | -0.27                  | -0.69 ; 0.15  | 0.212   | -0.24                         | -0.95 ; 0.47  | 0.511   |  |  |
| Medical treatment ( <i>yes</i> )                 | 157                 | 0.24              | -0.17 ; 0.65  | 0.257   | 0.49             | 0.08 ; 0.90   | 0.019   | 112 | 0.15                   | -0.30 ; 0.61  | 0.517   | 0.12                          | -0.63 ; 0.87  | 0.748   |  |  |
| Work-relatedness of disorder                     | 157                 | 0.11              | -0.09 ; 0.30  | 0.285   | 0.27             | 0.05 ; 0.49   | 0.016   | 111 | 0.19                   | -0.01 ; 0.38  | 0.058   | 0.36                          | 0.06 ; 0.65   | 0.019   |  |  |
| <i>Personal factors</i>                          |                     |                   |               |         |                  |               |         |     |                        |               |         |                               |               |         |  |  |
| RTW expectation ( <i>positive</i> )              | 157                 | -1.64             | -2.13 ; -1.15 | 0.000   | -1.42            | -1.90 ; -0.93 | 0.000   | 112 | -1.95                  | -2.74 ; -1.17 | 0.000   | -3.17                         | -4.35 ; -1.99 | 0.000   |  |  |
| RTW-SE ( <i>high</i> )                           | 157                 | -0.88             | -1.26 ; -0.50 | 0.000   | -1.02            | -1.47 ; -0.58 | 0.000   | 112 | -0.13                  | -0.56 ; 0.29  | 0.540   | -0.96                         | -1.65 ; -0.27 | 0.006   |  |  |
| Work ability                                     | 157                 | -0.34             | -0.42 ; -0.26 | 0.000   | -0.35            | -0.45 ; -0.26 | 0.000   | 112 | -0.08                  | -0.19 ; 0.03  | 0.158   | -0.34                         | -0.50 ; -0.17 | 0.000   |  |  |
| <i>Work-related factors</i>                      |                     |                   |               |         |                  |               |         |     |                        |               |         |                               |               |         |  |  |
| Company size ( <i>large</i> )                    | 157                 | 0.12              | -0.32 ; 0.57  | 0.592   | 0.15             | -0.33 ; 0.62  | 0.543   | 112 | 0.13                   | -0.30 ; 0.56  | 0.546   | 0.37                          | -0.33 ; 1.08  | 0.301   |  |  |
| Enterprise sector ( <i>private</i> )             | 157                 | 0.41              | -0.03 ; 0.85  | 0.069   | 0.12             | -0.35 ; 0.59  | 0.615   | 112 | -0.04                  | -0.47 ; 0.38  | 0.844   | -0.18                         | -0.90 ; 0.53  | 0.615   |  |  |
| Shiftwork ( <i>yes</i> )                         | 157                 | -0.48             | -1.03 ; 0.07  | 0.087   | -0.01            | -0.58 ; 0.55  | 0.961   | 112 | 0.13                   | -0.29 ; 0.55  | 0.553   | 0.12                          | -0.60 ; 0.84  | 0.744   |  |  |
| Civil servant ( <i>yes</i> )                     | 157                 | 0.52              | -0.24 ; 1.28  | 0.180   | 1.08             | 0.26 ; 1.89   | 0.010   | 112 | 0.51                   | -0.30 ; 1.33  | 0.216   | 1.11                          | -0.31 ; 2.53  | 0.125   |  |  |
| Quantitative demands                             | 157                 | 0.01              | -0.00 ; 0.02  | 0.186   | 0.01             | -0.00 ; 0.02  | 0.155   | 111 | 0.01                   | -0.01 ; 0.02  | 0.408   | 0.01                          | -0.01 ; 0.03  | 0.513   |  |  |
| Work-privacy conflict                            | 157                 | 0.01              | -0.00 ; 0.02  | 0.062   | 0.01             | 0.00 ; 0.02   | 0.015   | 111 | 0.01                   | -0.00 ; 0.02  | 0.154   | 0.02                          | 0.00 ; 0.03   | 0.025   |  |  |
| Influence at work                                | 157                 | 0.00              | -0.01 ; 0.01  | 0.857   | -0.00            | -0.02 ; 0.01  | 0.447   | 112 | -0.00                  | -0.01 ; 0.01  | 0.605   | -0.01                         | -0.03 ; 0.01  | 0.221   |  |  |
| Degrees of freedom at work                       | 157                 | -0.01             | -0.02 ; 0.05  | 0.271   | -0.01            | -0.02 ; -0.00 | 0.012   | 112 | -0.01                  | -0.01 ; 0.00  | 0.284   | -0.01                         | -0.03 ; 0.01  | 0.241   |  |  |
| Meaning of work                                  | 157                 | -0.01             | -0.02 ; -0.00 | 0.050   | -0.01            | -0.03 ; -0.00 | 0.022   | 112 | 0.00                   | -0.01 ; 0.01  | 0.833   | -0.01                         | -0.03 ; 0.01  | 0.399   |  |  |
| Quality of leadership                            | 155                 | -0.01             | -0.02 ; 0.00  | 0.078   | -0.00            | -0.02 ; 0.00  | 0.068   | 111 | -0.01                  | -0.01 ; 0.00  | 0.154   | -0.01                         | -0.02 ; 0.01  | 0.410   |  |  |
| Social support                                   | 157                 | -0.01             | -0.02 ; -0.00 | 0.020   | -0.02            | -0.03 ; -0.01 | 0.000   | 111 | -0.01                  | -0.02 ; 0.00  | 0.089   | -0.01                         | -0.03 ; 0.01  | 0.263   |  |  |

|                                     |     |       |       |   |       |       |       |       |   |       |       |     |                   |       |   |      |       |       |       |   |      |       |
|-------------------------------------|-----|-------|-------|---|-------|-------|-------|-------|---|-------|-------|-----|-------------------|-------|---|------|-------|-------|-------|---|------|-------|
| Sense of community                  | 157 | -0.01 | -0.02 | ; | -0.00 | 0.011 | -0.02 | -0.03 | ; | -0.01 | 0.001 | 111 | -0.00             | -0.01 | ; | 0.01 | 0.426 | -0.01 | -0.03 | ; | 0.00 | 0.102 |
| Mobbing                             | 157 | 0.25  | 0.07  | ; | 0.43  | 0.006 | 0.20  | 0.01  | ; | 0.39  | 0.040 | 111 | 0.16              | -0.06 | ; | 0.39 | 0.148 | 0.32  | -0.04 | ; | 0.68 | 0.079 |
| <i>Work accommodation needs</i>     |     |       |       |   |       |       |       |       |   |       |       |     |                   |       |   |      |       |       |       |   |      |       |
| Gradual RTW needed (yes)            | 157 | 0.59  | 0.19  | ; | 0.98  | 0.003 | 1.25  | 0.76  | ; | 1.75  | 0.000 | 112 | 0.54              | 0.06  | ; | 1.03 | 0.029 | 1.88  | 1.16  | ; | 2.60 | 0.000 |
| Workload reduction needed (yes)     | 157 | 0.08  | -0.34 | ; | 0.50  | 0.703 | 0.15  | -0.29 | ; | 0.60  | 0.504 | 112 | 0.57              | 0.12  | ; | 1.02 | 0.013 | 0.57  | -0.19 | ; | 1.33 | 0.144 |
| Individual RTW support needed (yes) | 157 | 0.32  | -0.21 | ; | 0.84  | 0.234 | 0.54  | 0.00  | ; | 1.07  | 0.049 | 112 | 0.64              | -0.31 | ; | 1.60 | 0.185 | 2.66  | 1.31  | ; | 4.01 | 0.000 |
| Change of workplace needed (yes)    | 157 | 0.47  | -0.18 | ; | 1.12  | 0.159 | 0.41  | -0.26 | ; | 1.08  | 0.229 | 112 | 1.32 <sup>1</sup> | 0.36  | ; | 2.27 | 0.007 | 1.72  | 0.49  | ; | 2.96 | 0.006 |

Coef. Coefficient; CI Confidence Interval; <sup>1</sup> Here, the lognormal regression model was applied, because Stata could not compute an improvement when using the ggamma regression model
